# Supplementary material
Source: PubMed Central journal article supplement (PMC4403649)
Supplement: JB.00009-15_zjb999093586so1.pdf [file JB.00009-15_zjb999093586so1.pdf]

## Supplemental Information

### Methods

#### Strain construction

Mutations in *trnD-Phe*, *hrcA*, *tyrS*, and *ppaC* were markerlessly reconstructed in *B. subtilis* 3610 using the pMiniMAD protocol as described (1) and primers 39-42 and 45-50. Successful double-crossover events were indicated by the absence of growth in the presence of erythromycin and lincomycin. Mutations were subsequently verified using primers 45, 46, 49, 50, and 57-60.

Luciferase reporters for readthrough of the *tyrS* riboswitch were constructed as follows. pAH328 (2) was digested with EcoRI and BamHI and a fragment of approximately 6 kb, containing the optimized, promoterless *luxABCDE* operon, was isolated by gel extraction. The *amyE* integrating vector pDG1662 (3) was digested with EcoRI and BamHI and a fragment of approximately 7 kb was isolated by gel extraction. The fragments were ligated and transformed into *E. coli* DH5 $\alpha$ , generating pLF007, and the construct was confirmed by restriction digestion using HindIII and PstI. The promoter region of *tyrS* (4) was amplified from *B. subtilis* 3610, SLH8, and SLH9 using primers 70 and 71, or from 3610 using primers 70 and 72, and combined by isothermal assembly (14) with pLF007 linearized with NotI and EcoRI to yield pSL001, pSL002, pSL003, and pSL008, respectively. The plasmids were maintained in *E. coli* Turbo in the presence of ampicillin, the promoter region sequences were verified with primers LF002F and LF002R, and the plasmids were transformed into *B. subtilis* 168. The constructs were moved by phage transduction into 3610 or SLH36 to yield strains SLH57, SLH58, SLH59, SLH61, and SLH75. Movement of the plasmids into *B. subtilis* was confirmed by growth on LB

agar containing chloramphenicol and proper insertion at *amyE* was verified by the inability of the strains to metabolize starch.

To construct the wild-type *tapA* complementation strain, primers AE1 and AE2 were used to amplify a fragment containing the *tapA* operon, including 200 bp upstream of the operon representing the promoter, from *B. subtilis* 3610 chromosomal DNA. To generate the mutated *tapA* variants, we created two fragments of the *tapA* operon overlapping at the desired mutation site, including the promoter, using primers AE1-AE6. The corresponding fragments were then joined in an isothermal assembly reaction (5) with pDG364 (6) linearized with BamHI and EcoRI to produce pAE164 (wild-type *tapA*), pAE165 (*tapA*<sup>558Δ</sup>), or pAE166 (*tapA*<sup>724ΩG</sup>). The plasmids were maintained in *E. coli* DH5α using selection with ampicillin. After verification of the *tapA* sequences with primers 55 and 56, the plasmids were transformed directly into SLH63, a derivative of *B. subtilis* 3610 lacking the *tapA* operon at the native locus. SLH63 was generated by phage transduction (7) of *tapA-sipW-tasA::spec* from strain RL4602. Movement of the plasmids into *B. subtilis* was confirmed by growth on LB agar containing chloramphenicol and proper insertion at *amyE* was verified by the inability of the strains to metabolize starch.

The *tyrS* overexpression strains were constructed as follows. Primers 76 and 77 were used to amplify the fragment containing the *tyrS* riboswitch, ribosome binding site (RBS), and open reading frame (ORF) from *B. subtilis* 3610 chromosomal DNA. Primers 76 and 86 were used to amplify the fragment containing the *tyrS* RBS and ORF from *B. subtilis* 3610 chromosomal DNA. The resulting fragments were then joined in an isothermal assembly reaction (5) with pDR111 (8) linearized with HindIII and SphI to produce pSL004 (*tyrS* riboswitch, RBS, and ORF) or pSL005 (*tyrS* RBS and ORF). The plasmids were maintained in *E. coli* Turbo using selection with ampicillin. After verification of the plasmid inserts with

primers pDR111F and pDR111R, the plasmids were transformed directly into *B. subtilis* 3610 to generate strains SLH69 and SLH70. Movement of the plasmids into *B. subtilis* was confirmed by growth on LB agar containing spectinomycin and proper insertion at *amyE* was verified by the inability of the strains to metabolize starch.

**Table S1. Strains, plasmids, and primers used in this study.**

| Strain   | Genotype or description                                                                               | Source           |
|----------|-------------------------------------------------------------------------------------------------------|------------------|
| NCIB3610 | Parental strain (wild-strain) <i>B. subtilis</i>                                                      | Laboratory stock |
| 168      | Lab strain of <i>B. subtilis</i> , <i>trpC2</i>                                                       | Laboratory stock |
| SLH7     | Spontaneous D-LMWY resistance mutant, <i>ppaC</i> <sup>434C&gt;T</sup>                                | This study       |
| SLH8     | Spontaneous D-LMWY resistance mutant, <i>tyrS</i> <sup>-38QC</sup>                                    | This study       |
| SLH9     | Spontaneous D-LMWY resistance mutant, <i>tyrS</i> <sup>-38C&gt;T</sup>                                | This study       |
| SLH10    | Spontaneous D-LMWY resistance mutant, <i>ppaC</i> <sup>234A&gt;T</sup>                                | This study       |
| SLH13    | Spontaneous D-LMWY resistance mutant, <i>trnD-Phe</i> <sup>35A&gt;T</sup>                             | This study       |
| SLH15    | Spontaneous D-LMWY resistance mutant, <i>hrcA</i> <sup>-8A&gt;G</sup> <i>ppaC</i> <sup>Δ496-498</sup> | This study       |
| SLH16    | Spontaneous D-LMWY resistance mutant, <i>tyrS</i> <sup>605G&gt;A</sup>                                | This study       |
| SLH31    | <i>dtd</i> <sup>2T&gt;A</sup> in NCIB3610                                                             | (9)              |
| ALM89    | <i>sacA::P<sub>epsA</sub>-lux</i> in NCIB3610, Cm <sup>R</sup>                                        | (10)             |
| SLH32    | <i>sacA::P<sub>epsA</sub>-lux</i> in SLH31, Cm <sup>R</sup>                                           | This study       |
| ALM91    | <i>sacA::P<sub>tapA</sub>-lux</i> in NCIB3610, Cm <sup>R</sup>                                        | (10)             |
| SLH33    | <i>sacA::P<sub>tapA</sub>-lux</i> in SLH31, Cm <sup>R</sup>                                           | This study       |
| SLH34    | <i>ppaC</i> <sup>434C&gt;T</sup> in NCIB3610                                                          | This study       |
| SLH35    | <i>tyrS</i> <sup>-38C&gt;T</sup> in NCIB3610                                                          | This study       |
| SLH36    | <i>trnD-Phe</i> <sup>35A&gt;T</sup> in NCIB3610                                                       | This study       |
| SLH37    | <i>hrcA</i> <sup>-8A&gt;G</sup> in NCIB3610                                                           | This study       |
| SLH38    | <i>tyrS</i> <sup>605G&gt;A</sup> in NCIB3610                                                          | This study       |
| SLH57    | <i>amyE::P<sub>tyrS</sub>-lux</i> (from NCIB3610) in NCIB3610, Cm <sup>R</sup>                        | This study       |
| SLH58    | <i>amyE::P<sub>tyrS</sub>-lux</i> (from NCIB3610) in SLH36, Cm <sup>R</sup>                           | This study       |
| SLH59    | <i>amyE::P<sub>tyrS</sub>-lux</i> (from SLH8) in NCIB3610, Cm <sup>R</sup>                            | This study       |
| SLH61    | <i>amyE::P<sub>tyrS</sub>-lux</i> (from SLH9) in NCIB3610, Cm <sup>R</sup>                            | This study       |
| SLH63    | <i>tapA-sipW-tasA::spec</i>                                                                           | This study       |
| SLH64    | <i>tapA-sipW-tasA::spec, amyE::tapA-sipW-tasA</i> , Cm <sup>R</sup>                                   | This study       |
| SLH65    | <i>tapA-sipW-tasA::spec, amyE::tapA2-sipW-tasA</i> , Cm <sup>R</sup>                                  | This study       |
| SLH66    | <i>tapA-sipW-tasA::spec, amyE::tapA6-sipW-tasA</i> , Cm <sup>R</sup>                                  | This study       |
| SLH69    | <i>amyE::P<sub>hyspank</sub>-tyrS</i> <sup>-366-1269</sup> , Spec <sup>R</sup>                        | This study       |
| SLH70    | <i>amyE::P<sub>hyspank</sub>-tyrS</i> <sup>-16-1269</sup> , Spec <sup>R</sup>                         | This study       |
| SLH75    | <i>amyE::P<sub>tyrS</sub>-lux</i> (no terminator) in NCIB3610, Cm <sup>R</sup>                        | This study       |
| RL4602   | <i>tapA-sipW-tasA::spec, amyE::ΔtapA(13-234)-sipW-tasA</i> , Cm <sup>R</sup>                          | Laboratory stock |

**Table S1 (Continued). Strains, plasmids, and primers used in this study.**

| Strain                | Genotype or description                                                                                                     | Source          |
|-----------------------|-----------------------------------------------------------------------------------------------------------------------------|-----------------|
| Turbo <i>E. coli</i>  | <i>recA<sup>+</sup> endA1 Δ(hsdS-mcrB)5</i>                                                                                 | NEB             |
| DH5α                  | <i>recA1 endA1 hsdR17 (r<sub>K</sub><sup>-</sup>, m<sub>K</sub><sup>+</sup>) relA1</i>                                      | Invitrogen      |
| BL21 (De3)            | <i>F<sup>-</sup> ompT hsdSB (r<sub>B</sub><sup>-</sup> m<sub>B</sub><sup>-</sup>) gal dcm (DE3)</i>                         | EMD Biosciences |
| Arctic Express (De3)  | BL21 derivative for improved protein folding and solubility                                                                 | Agilent         |
| AE-pET28-BsubTyrRS-WT | Arctic Express cells harboring pSL006                                                                                       | This study      |
| AE-pET28-BsubTyrRS-AV | Arctic Express cells harboring pSL007                                                                                       | This study      |
| Rosetta (De3)         | <i>F<sup>-</sup> ompT hsdSB(r<sub>B</sub><sup>-</sup> m<sub>B</sub><sup>-</sup>) gal dcm (DE3) pRARE2 (Cam<sup>R</sup>)</i> | EMD Biosciences |

| Plasmid | Genotype or description                                                                                                                                      | Source     |
|---------|--------------------------------------------------------------------------------------------------------------------------------------------------------------|------------|
| pDG364  | <i>amyE</i> -integration vector, Amp <sup>R</sup> , Cm <sup>R</sup>                                                                                          | (6)        |
| pDG1662 | <i>amyE</i> -integration vector, Amp <sup>R</sup> , Cm <sup>R</sup>                                                                                          | (3)        |
| pAH328  | <i>sacA</i> -integration vector with <i>luxABCDE</i> , Amp <sup>R</sup> , Cm <sup>R</sup>                                                                    | (2)        |
| pAE164  | <i>amyE</i> -integration vector with <i>tapA-sipW-tasA</i> , Amp <sup>R</sup> , Cm <sup>R</sup>                                                              | This study |
| pAE165  | <i>amyE</i> -integration vector with <i>tapA<sup>558Δ</sup>-sipW-tasA</i> , Amp <sup>R</sup> , Cm <sup>R</sup>                                               | This study |
| pAE166  | <i>amyE</i> -integration vector with <i>tapA<sup>724ΩG</sup>-sipW-tasA</i> , Amp <sup>R</sup> , Cm <sup>R</sup>                                              | This study |
| pLF007  | <i>amyE</i> -integration vector with <i>luxABCDE</i> , Amp <sup>R</sup> , Cm <sup>R</sup>                                                                    | This study |
| pSL001  | <i>amyE</i> -integration vector with P <sub>tyrS</sub> from NCIB3610 fused to <i>luxABCDE</i> , Amp <sup>R</sup> , Cm <sup>R</sup>                           | This study |
| pSL002  | <i>amyE</i> -integration vector with P <sub>tyrS</sub> from SLH8 fused to <i>luxABCDE</i> , Amp <sup>R</sup> , Cm <sup>R</sup>                               | This study |
| pSL003  | <i>amyE</i> -integration vector with P <sub>tyrS</sub> from SLH9 fused to <i>luxABCDE</i> , Amp <sup>R</sup> , Cm <sup>R</sup>                               | This study |
| pDR111  | <i>amyE</i> integration vector with P <sub>hyspank</sub> , Spec <sup>R</sup>                                                                                 | (8)        |
| pSL004  | Derived from pDR111, P <sub>hyspank</sub> - <i>tyrS</i> <sup>-366-1269</sup> , Spec <sup>R</sup>                                                             | This study |
| pSL005  | Derived from pDR111, P <sub>hyspank</sub> - <i>tyrS</i> <sup>-16-1269</sup> , Spec <sup>R</sup>                                                              | This study |
| pET-28a | T7 promoter, <i>lac</i> operator, His <sub>6</sub> tag (N or C)                                                                                              | Novagen    |
| pSL006  | Derived from pET-28a to express IPTG-inducible TyrRS-His <sub>6</sub> ( <i>tyrS</i> from NCIB3610)                                                           | This study |
| pSL007  | Derived from pET-28a to express IPTG-inducible TyrRS-His <sub>6</sub> ( <i>tyrS</i> from SLH38)                                                              | This study |
| pSL008  | <i>amyE</i> -integration vector with P <sub>tyrS</sub> lacking the terminator hairpin sequence fused to <i>luxABCDE</i> , Amp <sup>R</sup> , Cm <sup>R</sup> | This study |



**Table S1 (Continued). Strains, plasmids, and primers used in this study.**

| Primer | Sequence                                                        | Primary Use                      |
|--------|-----------------------------------------------------------------|----------------------------------|
| AE1    | GGTAGCGACCGGCGCTCAGGATCCGATCATCATGCTGTCACCCCTTCTTTG             | construct pAE164, pAE165, pAE166 |
| AE2    | GCCGATGATAAGCTGTCAAACATGAGAATTCTTAATTTTTATCCTCGCTATGCGCTT<br>TT | construct pAE164, pAE165, pAE166 |
| AE3    | GAGGCTTGCAAATGCGATGAAAAAC                                       | construct pAE165                 |
| AE4    | GTTTTTCATCGCATTGCAAGCCTC                                        | construct pAE165                 |
| AE5    | GAAGGAAAGCGGGGAAGAGGATG                                         | construct pAE166                 |
| AE6    | CATCCTCTTCCCCGCTTCCTTC                                          | construct pAE166                 |

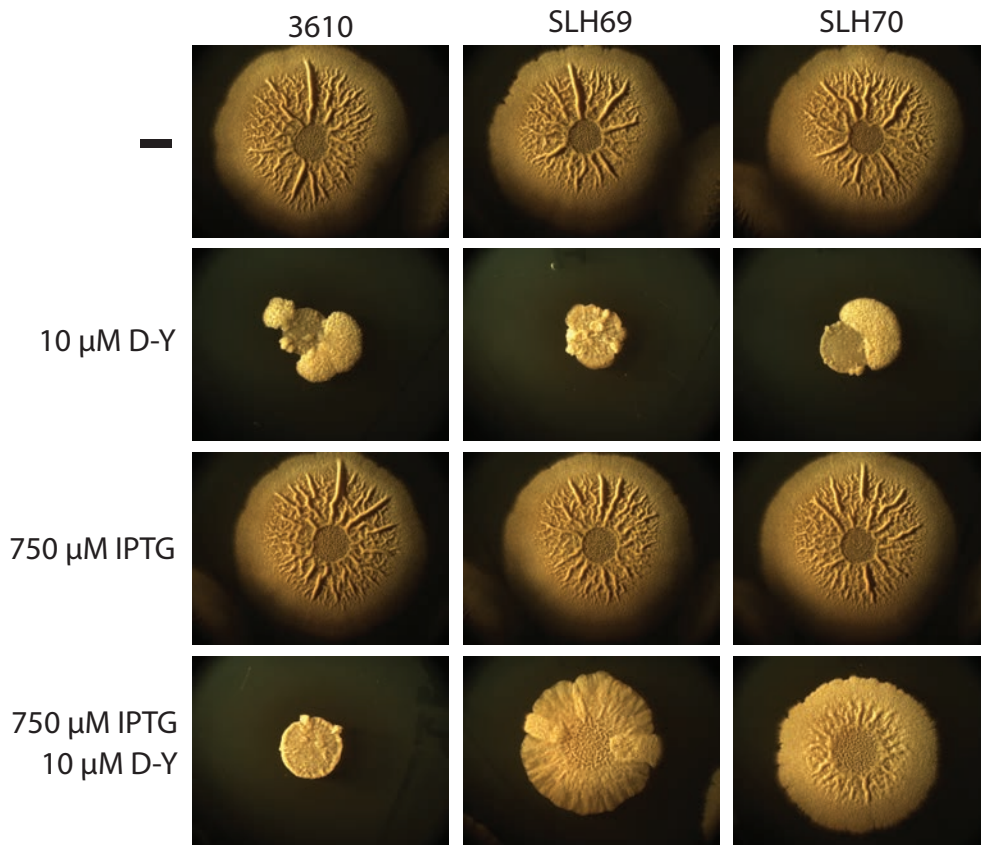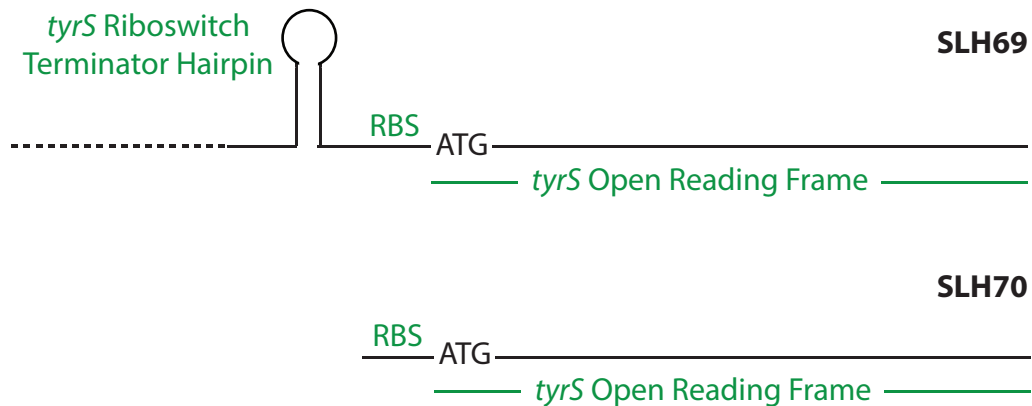

**Figure S1. Overexpression of *tyrS* is sufficient to induce D-Tyr resistance.** *B. subtilis* 3610, SLH69, and SLH70 were spotted on solid MSgg containing supplements as indicated. Plates were incubated at 30°C and imaged after three days. Schematics illustrate the constructs used to overexpress the *tyrS* riboswitch, RBS, and open reading frame (in SLH69) or to overexpress the *tyrS* RBS and open reading frame (in SLH70). Both overexpression constructs were introduced at the *amyE* locus and include an IPTG-inducible promoter. The dotted line represents the *tyrS* riboswitch upstream of the terminator hairpin.



## References

1. **Patrick JE, Kearns DB.** 2008. MinJ (YvjD) is a topological determinant of cell division in *Bacillus subtilis*. *Molecular Microbiology* **70**:1166-1179.
2. **Chen Y, Cao S, Chai Y, Clardy J, Kolter R, Guo JH, Losick R.** 2012. A *Bacillus subtilis* sensor kinase involved in triggering biofilm formation on the roots of tomato plants. *Molecular Microbiology* **85**:418-430.
3. **Guerout-Fleury AM, Frandsen N, Stragier P.** 1996. Plasmids for ectopic integration in *Bacillus subtilis*. *Gene* **180**:57-61.
4. **Henkin TM, Glass BL, Grundy FJ.** 1992. Analysis of the *Bacillus subtilis* *tyrS* gene: conservation of a regulatory sequence in multiple tRNA synthetase genes. *Journal of Bacteriology* **174**:1299-1306.
5. **Gibson DG, Young L, Chuang RY, Venter JC, Hutchison CA, 3rd, Smith HO.** 2009. Enzymatic assembly of DNA molecules up to several hundred kilobases. *Nature Methods* **6**:343-345.
6. **Harwood CR, Cutting SM.** 1990. *Molecular biological methods for Bacillus*. Wiley, Chichester; New York.
7. **Kearns DB, Chu F, Branda SS, Kolter R, Losick R.** 2005. A master regulator for biofilm formation by *Bacillus subtilis*. *Molecular Microbiology* **55**:739-749.
8. **Ben-Yehuda S, Rudner DZ, Losick R.** 2003. RacA, a bacterial protein that anchors chromosomes to the cell poles. *Science* **299**:532-536.
9. **Leiman SA, May JM, Lebar MD, Kahne D, Kolter R, Losick R.** 2013. D-Amino Acids Indirectly Inhibit Biofilm Formation in *Bacillus subtilis* by Interfering with Protein Synthesis. *Journal of Bacteriology* **195**:5391-5395.
10. **Leiman SA, Arboleda LC, Spina JS, McLoon AL.** 2014. SinR is a mutational target for fine-tuning biofilm formation in laboratory-evolved strains of *Bacillus subtilis*. *BMC Microbiology* **14**:301.
